# Supplementary material for: Self-powered, visible-light photodetector based on thermally reduced graphene oxide–ZnO (rGO–ZnO) hybrid nanostructure
Source: Royal Society of Chemistry journal article supplement (doi:10.1039/c1jm13920g), 2011-12-21
Supplement: c1jm13920g.pdf [file c1jm13920g.pdf]

Supplement information

**Self-powered, visible-light photodetector based on thermally reduced  
graphene oxide-ZnO (rGO-ZnO) hybrid nanostructure**

Zhaoyao Zhan,<sup>a</sup> Lianxi Zheng,<sup>a\*</sup> Yongzheng Pan,<sup>a</sup> Gengzhi Sun,<sup>a</sup> and Lin Li<sup>a</sup>

<sup>a</sup> School of Mechanical and Aerospace Engineering, Nanyang Technological University, Nanyang Ave. 50, 639798, Singapore. Tel: +65 6790 4163;

\* Correspondence should be addressed to E-mail: [lxzheng@ntu.edu.sg](mailto:lxzheng@ntu.edu.sg).

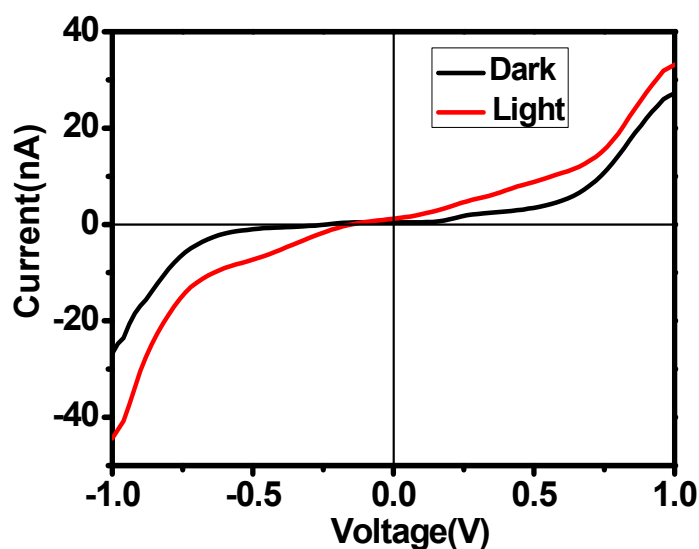

Figure S1. I-V characteristic curves of carbon-doped ZnO-nanoparticle photodetector under dark condition and illumination.

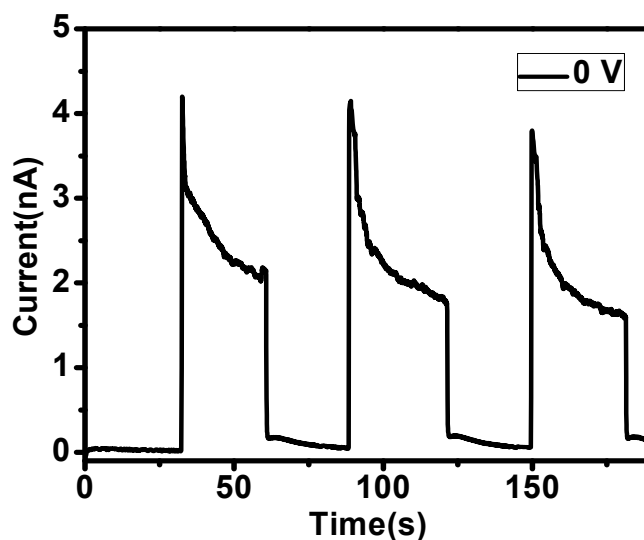

Figure S2. The time-resolved photocurrent generation under zero-bias operation with illumination toggling between “on” and “off” for carbon-doped ZnO-nanoparticle photodetector.
